# Supplementary material for: Real-time detection and imaging of copper(ii) in cellular mitochondria
Source: Royal Society of Chemistry journal article supplement (doi:10.1039/c6ob02384c), 2016-11-28
Supplement: c6ob02384c2.pdf [file c6ob02384c2.pdf]

## Supporting Information (SI)

### Real-time Detection and Imaging of Copper (II) in Cellular Mitochondria

Hong Li<sup>a</sup>, Ruilong Zhang<sup>a</sup>, Chunxia Li<sup>b</sup>, Bei Huang<sup>b</sup>, Tingting Yu<sup>a</sup>, Xiaodan Huang<sup>a</sup>,  
Xuejun Zhang<sup>c</sup>, Fei Li<sup>a,\*</sup>, Hongping Zhou<sup>a,\*</sup>, Yupeng Tian<sup>a</sup>

<sup>a</sup>College of Chemistry and Chemical Engineering, Anhui University and Key Laboratory of Functional Inorganic Materials Chemistry of Anhui Province, 230601, Hefei, P.R. China

<sup>b</sup>Center of Stem cell Research and Transformation Medicine, Anhui University, Hefei 230601, P. R. China.

<sup>c</sup>Faculty of Health Science, University of Macau, Taipa, Macau SAR. P.R. China

Corresponding author. Fax: +86-551-63861279; Tel: +86-551-63861279

E-mail: zhpzhp@263.net

**Fig. S1:** <sup>1</sup>H NMR spectrum of L (in DMSO-*d*<sub>6</sub>)

**Fig. S2:** <sup>13</sup>C NMR spectrum of L (in DMSO-*d*<sub>6</sub>)

**Fig. S3:** FT-IR of L in KBr

**Fig. S4:** APCI-Mass spectrum of L

**Fig. S5:** A color change photograph for Cu<sup>2+</sup> and the other metal ions under visible light.

**Fig. S6:** A color change photograph for Cu<sup>2+</sup> and the other metal ions under UV light at 365 nm.

**Fig. S7:** Fluorescence intensity of 10 μL probe L at 450nm over a wide pH range of 4.0–11.0.

**Fig. S8:** Job's plot of the complexation between the probe L and Cu<sup>2+</sup>. The total concentration of probe L and Cu<sup>2+</sup> was 50 μM.

**Fig. S9:** Benesi-Hildebrand plot of L-Cu<sup>2+</sup> complexe in mixed solution (water-tetrahydrofuran, 1:1, v/v).

**Fig. S10:** Fluorescence titration of L-Cu<sup>2+</sup> in mixed solution ( tetrahydrofuran- water, 1:1, v/v) at 450nm.

**Fig. S11:** Fluorescence spectra of L (10 μM) in the presence of Cu<sup>2+</sup> (1.0 equiv.) and EDTA

(1.0 equiv.) in mixed solution (water-tetrahydrofuran, 1:1, v/v).

**Fig. S12:** MTT assay of HepG2 cells treated with probe L at different concentrations for 24 h.

**Fig. S13:** Photon-bleach experiment showed L photostability over continued laser scanning.

**Fig. S14:** Confocal fluorescent images: a1-d1 is dark-field, a2-d2 is bright-field, a3-d3 is overlay, and the concentration of probe L from a – d is  $1 \times 10^{-5}$  mol/L,  $5 \times 10^{-6}$  mol/L,  $1 \times 10^{-6}$  mol/L,  $1 \times 10^{-7}$  mol/L.

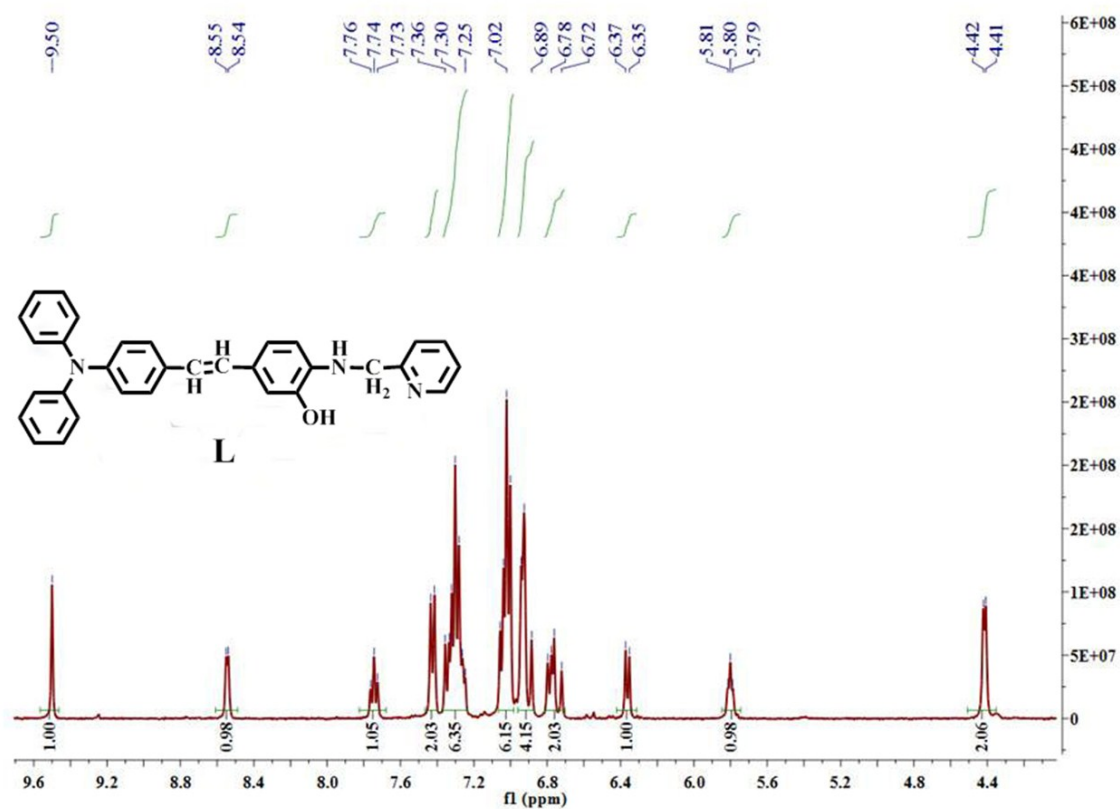

**Fig. S1:**  $^1\text{H}$  NMR spectrum of L (in  $\text{DMSO-}d_6$ )

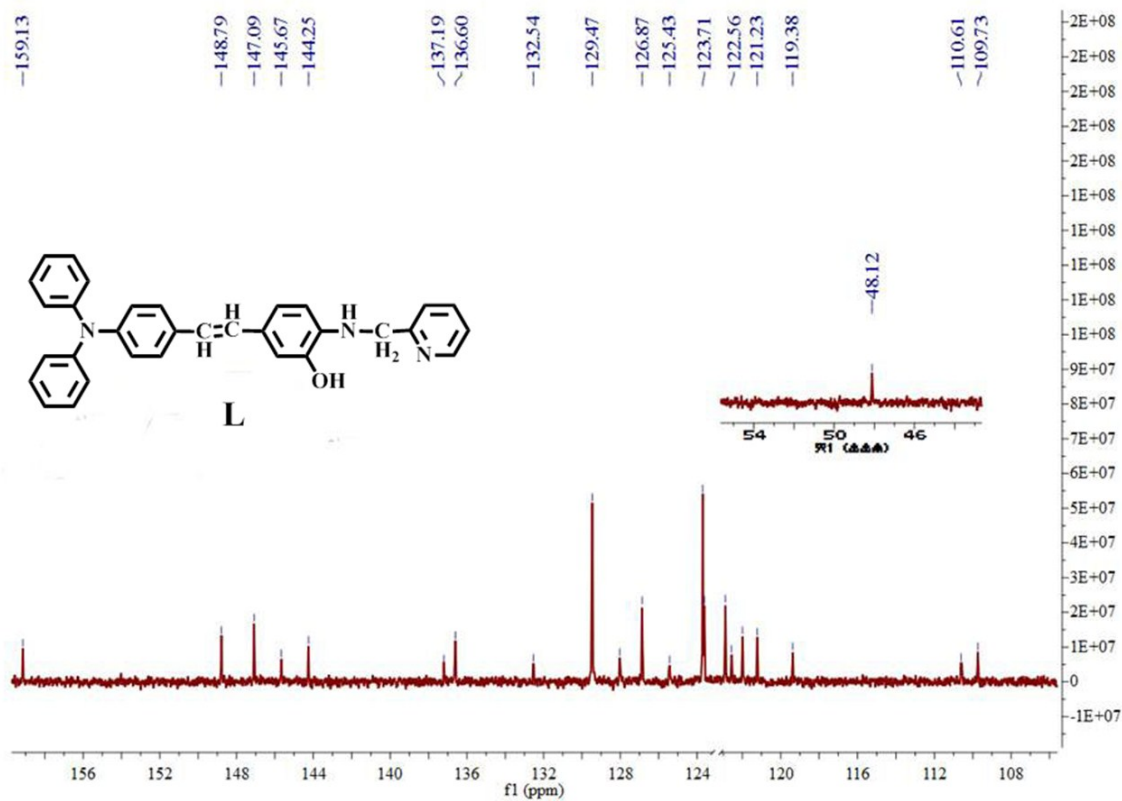

**Fig. S2:**  $^{13}\text{C}$  NMR spectrum of L (in DMSO- $d_6$ )

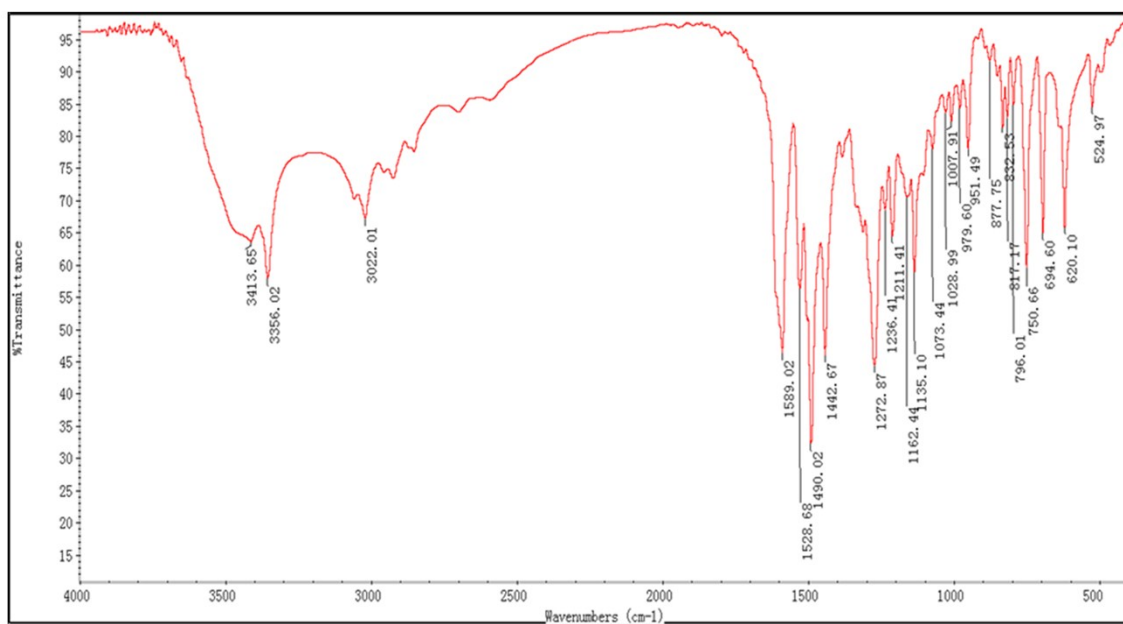

**Fig. S3:** FT-IR of L in KBr

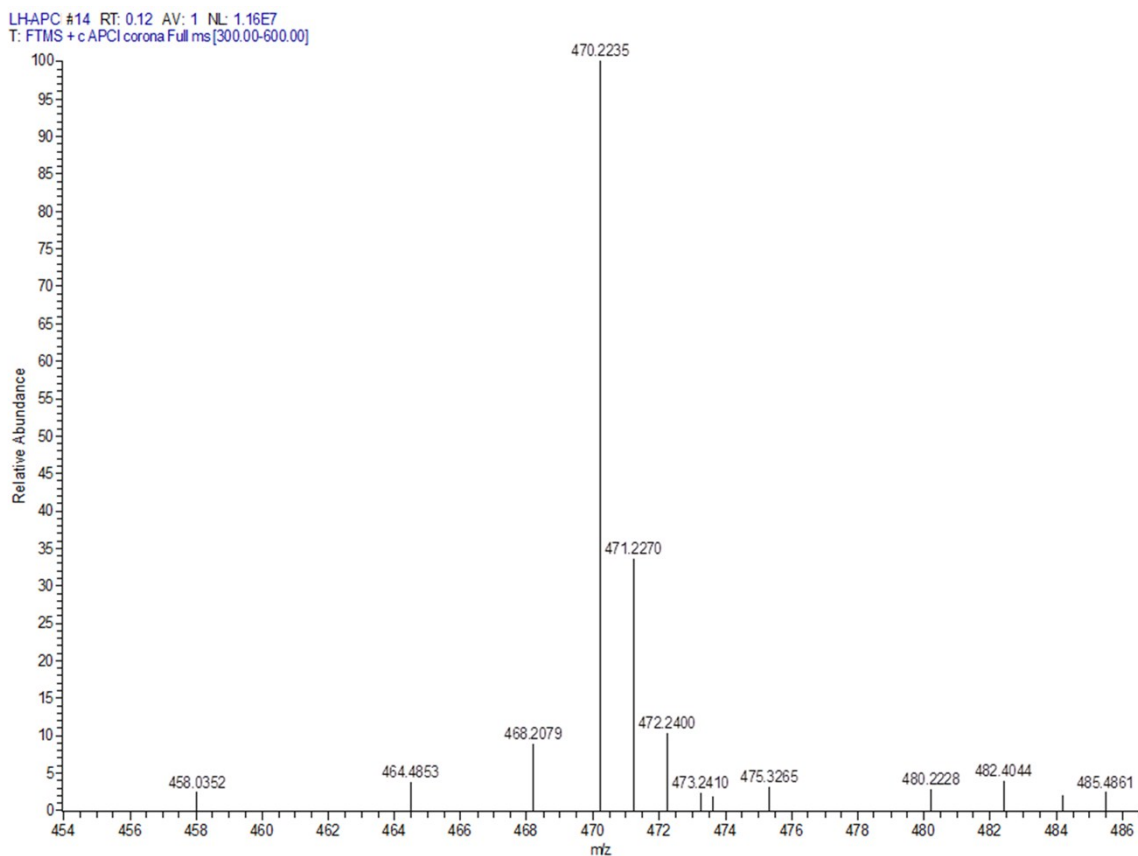

**Fig. S4:** APCI-Mass spectrum of L

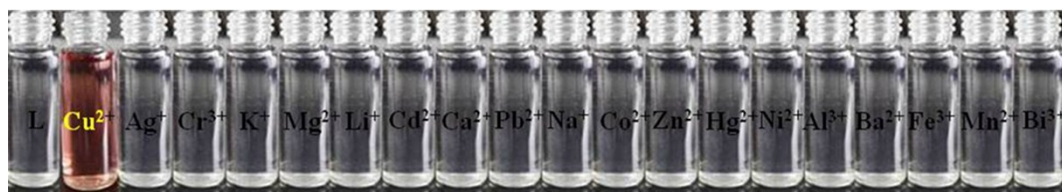

**Fig. S5:** A color change photograph for  $\text{Cu}^{2+}$  and the other metal ions under visible light.

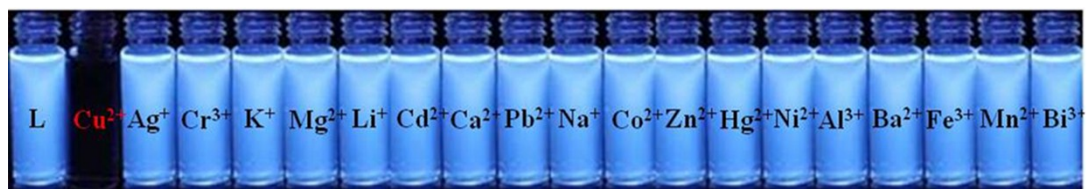

**Fig. S6:** A color change photograph for  $\text{Cu}^{2+}$  and the other metal ions under UV light at 365 nm.

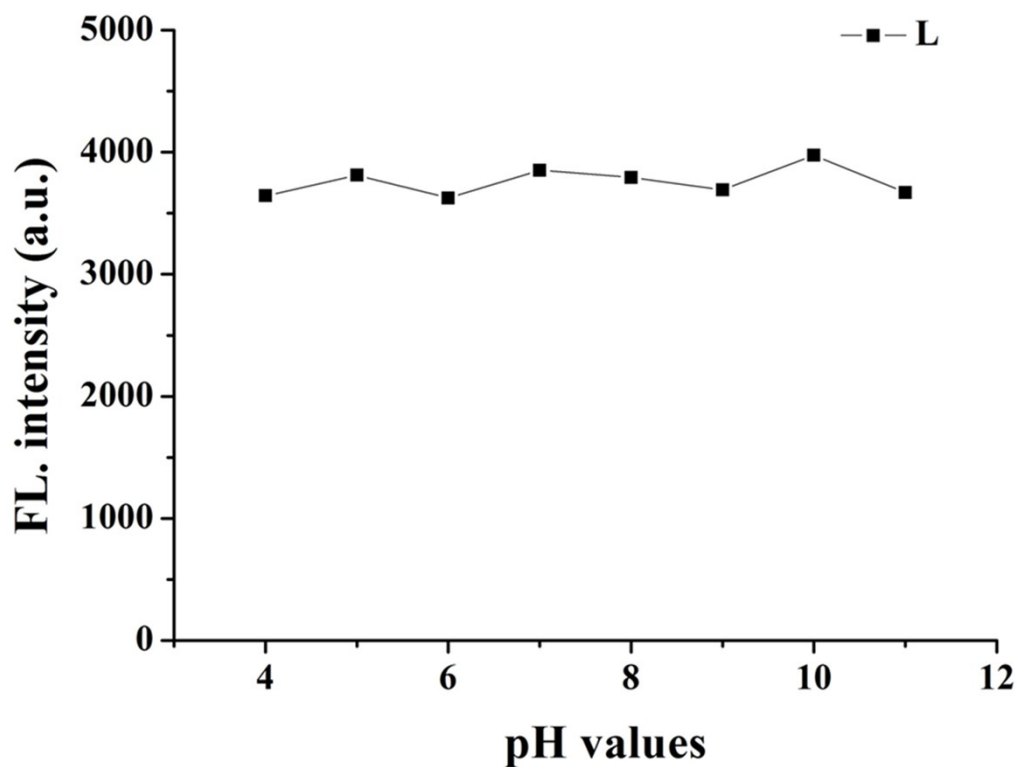

Fig. S7: Fluorescence intensity of 10  $\mu$ L probe L at 450nm over a wide pH range of 4.0–11.0.

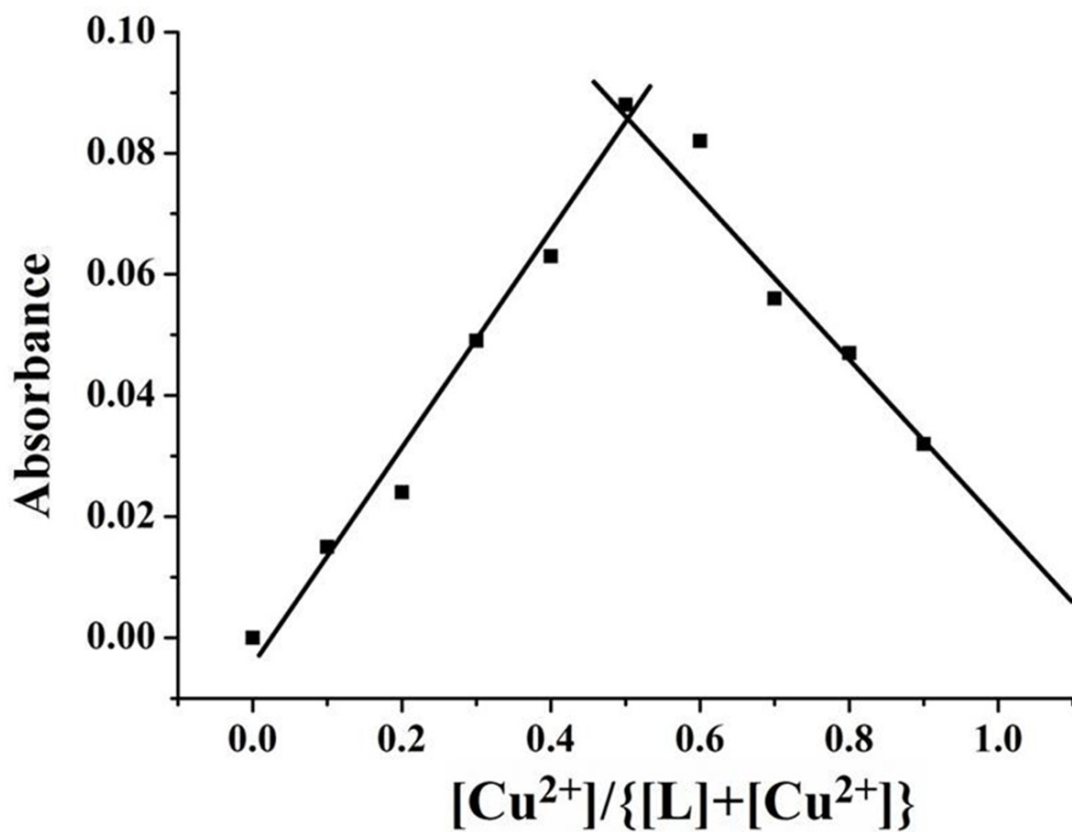

**Fig. S8:** Job's plot of the complexation between the probe L and  $\text{Cu}^{2+}$ . The total concentration of probe L and  $\text{Cu}^{2+}$  was  $50 \mu\text{M}$ .

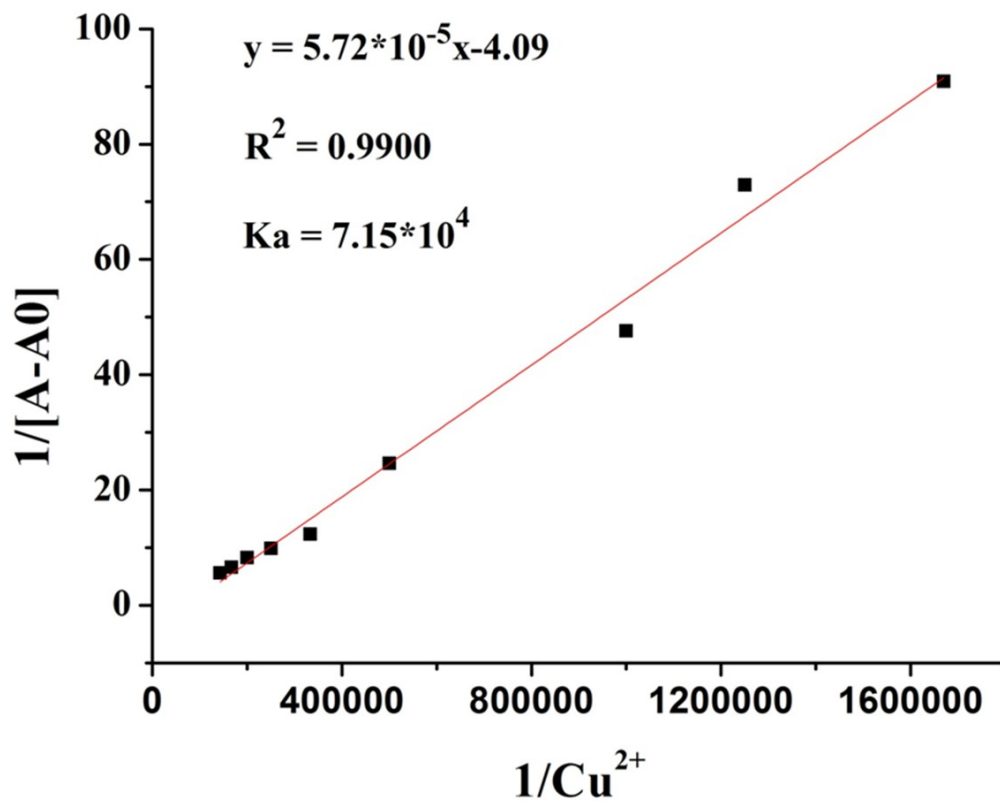

**Fig. S9:** Benesi-Hildebrand plot of L- $\text{Cu}^{2+}$  complexes in mixed solution (water-tetrahydrofuran, 1:1, v/v).

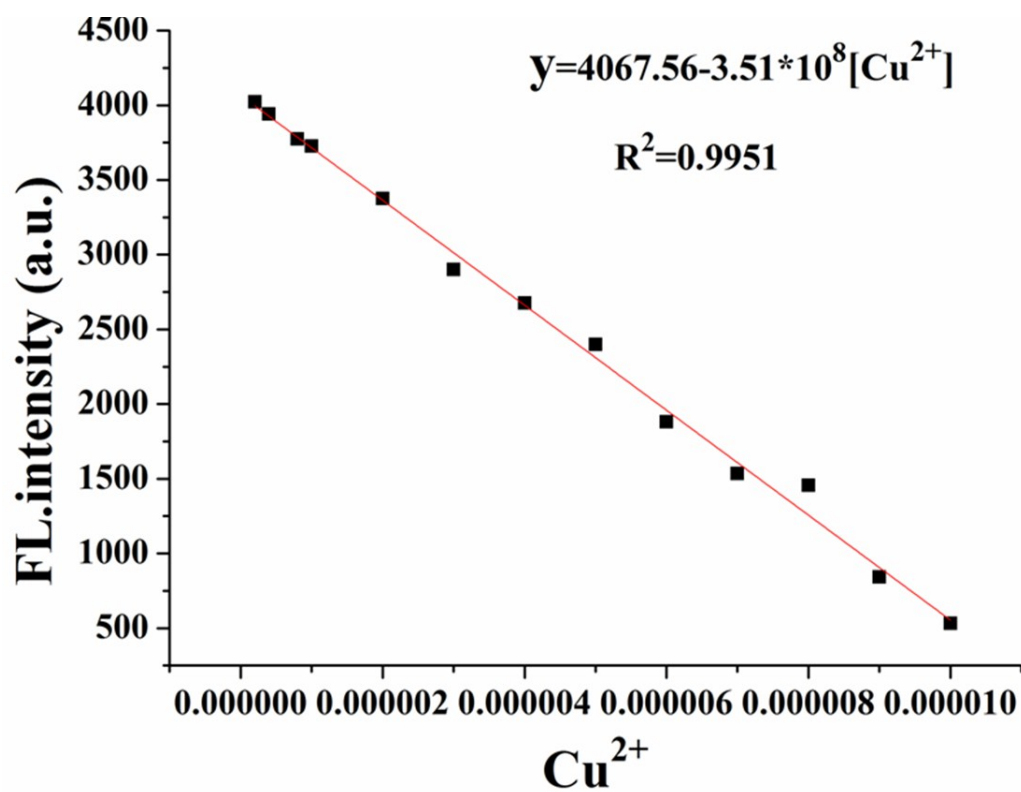

**Fig. S10:** Fluorescence titration of L- $\text{Cu}^{2+}$  in mixed solution ( tetrahydrofuran- water ,1:1,v/v) at 450nm.

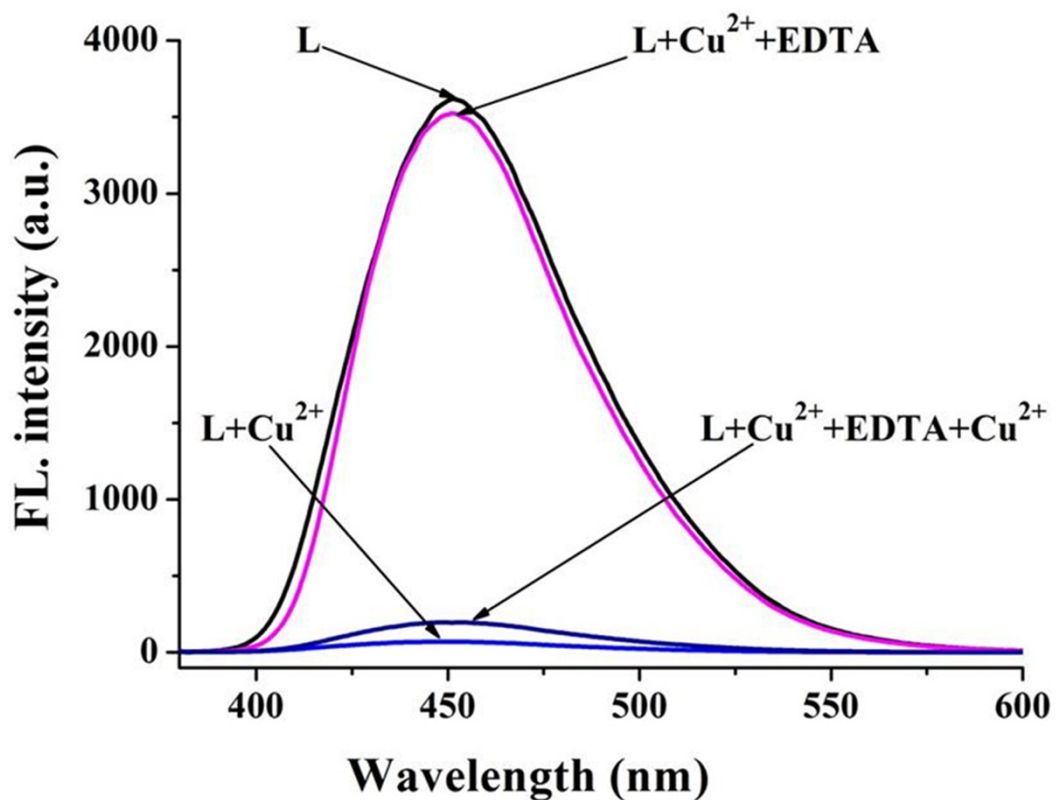

**Fig. S11:** Fluorescence spectra of L (10  $\mu\text{M}$ ) in the presence of  $\text{Cu}^{2+}$  (1.0 equiv.) and EDTA

(1.0 equiv.) in mixed solution (water-tetrahydrofuran,1:1,v/v).

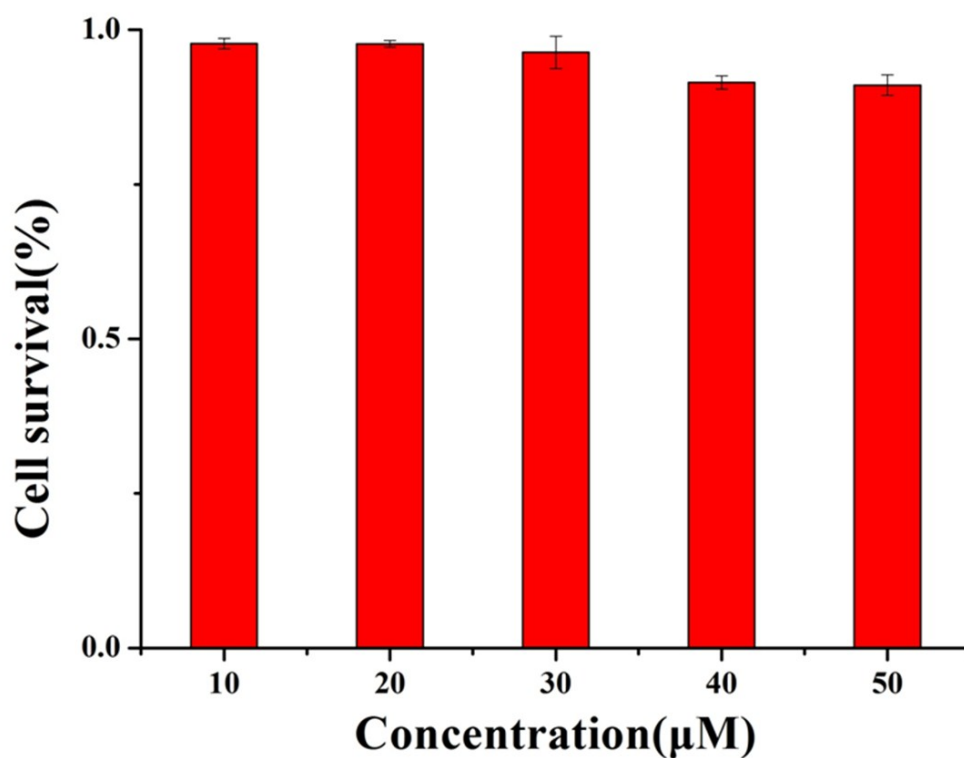

**Fig. S12:** MTT assay of HepG2 cells (TCHu 72) treated with probe L at different concentrations for 24 h.

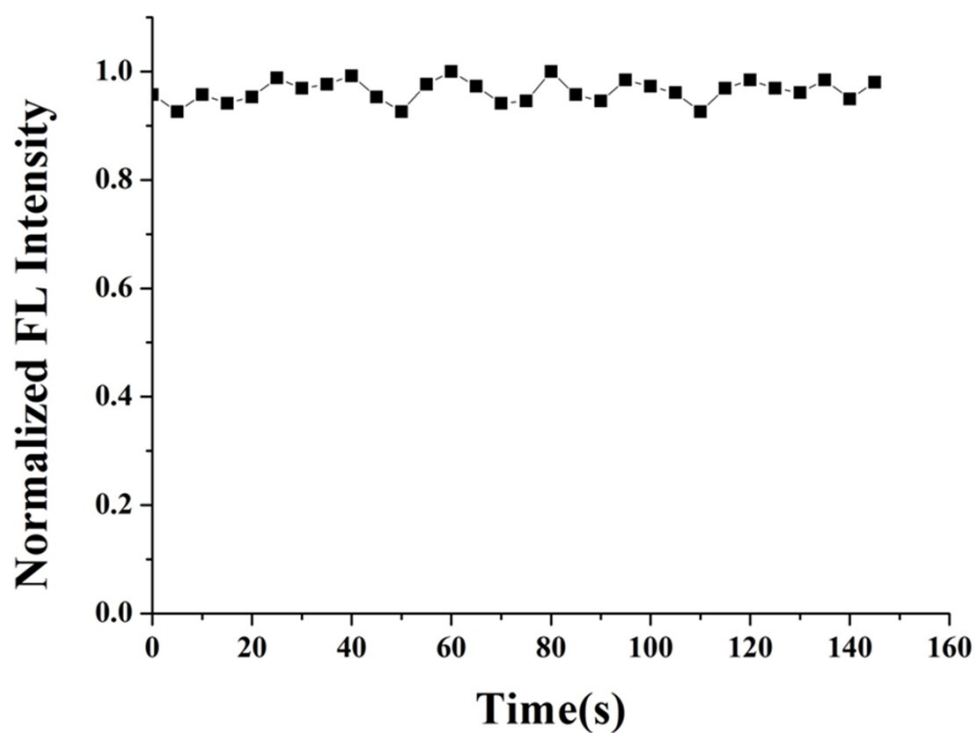

**Fig. S13:** Photon-bleach experiment showed L photostability over continued laser scanning.



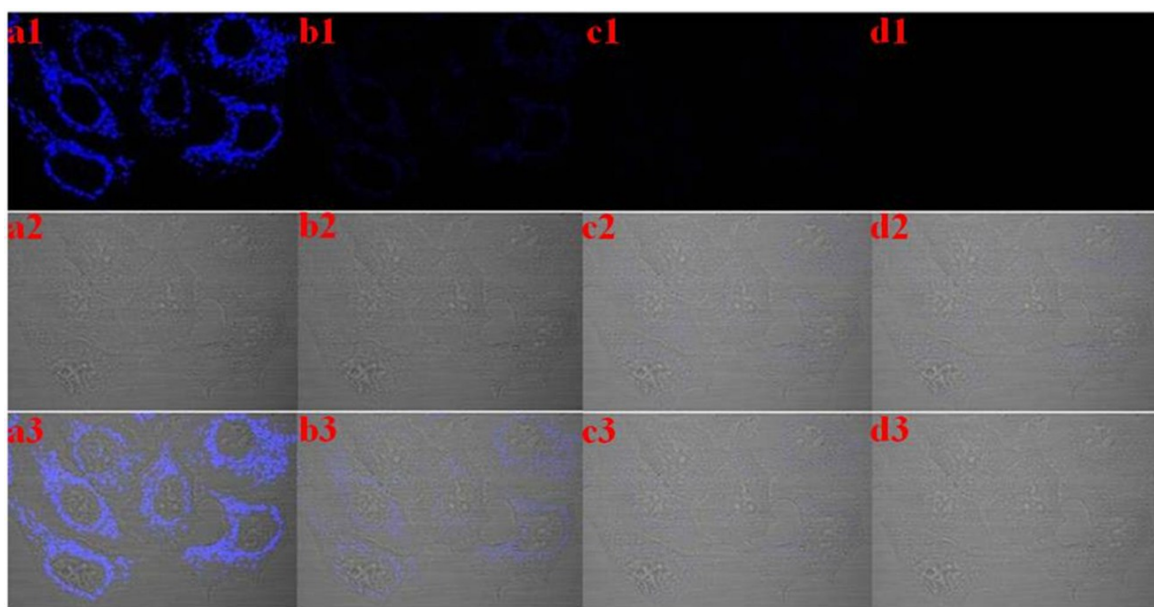

**Fig. S14:** Confocal fluorescent images: a1-d1 is dark-field, a2-d2 is bright-field, a3-d3 is overlay, and the concentration of probe L from a – d is  $1 \times 10^{-5}$  mol/L,  $5 \times 10^{-6}$  mol/L,  $1 \times 10^{-6}$  mol/L,  $1 \times 10^{-7}$  mol/L.
